# Supplementary material
Source: PubMed Central journal article supplement (PMC5833596)

## Supplementary Online Content

Osazuwa-Peters N, Boakye EA, Chen BY, Tobo BB, Varvares MA. Association between head and neck squamous cell carcinoma survival, smoking at diagnosis, and marital status. *JAMA Otolaryngol Head Neck Surg*. Published online November 9, 2017. doi:10.1001/jamaoto.2017.1880

**eTable.** Cox proportional hazards model assessing the association between sociodemographic, tumor, and treatment characteristics and mortality

**eFigure.** Kaplan-Meier survival curve showing the unadjusted association between smoking status at diagnosis and mortality

This supplementary material has been provided by the authors to give readers additional information about their work.

**eTable.** Cox proportional hazards model assessing the association between sociodemographic, tumor, and treatment characteristics and mortality - excluding patients with oropharyngeal cancer, 1997 to 2012 (n=294)

|                                            | cHR (95 % CI)     | aHR (95 % CI)     |
|--------------------------------------------|-------------------|-------------------|
| <b>Smoking Status</b>                      |                   |                   |
| Yes                                        | 1.51 (1.09, 2.10) | 2.32 (1.50, 3.59) |
| No                                         | Ref               | Ref               |
| <b>Marital Status</b>                      |                   |                   |
| Not Married                                | 1.66 (1.21, 2.26) | 2.04 (1.39, 2.99) |
| Married                                    | Ref               | Ref               |
| <b>Age</b>                                 |                   |                   |
| 65+                                        | 2.17 (1.31, 3.59) | 2.44 (1.31, 4.55) |
| 50-65                                      | 1.75 (1.07, 2.87) | 1.60 (0.90, 2.86) |
| 18-49                                      | Ref               | Ref               |
| <b>Sex</b>                                 |                   |                   |
| Male                                       | 1.35 (0.94, 1.92) | 1.65 (1.08, 2.50) |
| Female                                     | Ref               | Ref               |
| <b>Race</b>                                |                   |                   |
| Other                                      | 2.02 (0.64, 6.36) | 1.39 (0.42, 4.67) |
| Black                                      | 1.76 (1.22, 2.54) | 1.64 (0.99, 2.69) |
| White                                      | Ref               | Ref               |
| <b>Insurance</b>                           |                   |                   |
| No Insurance                               | 1.14 (0.55, 2.40) | 0.69 (0.26, 1.80) |
| Government                                 | 1.72 (1.24, 2.39) | 0.98 (0.64, 1.48) |
| Private                                    | Ref               | Ref               |
| <b>Alcohol use</b>                         |                   |                   |
| Yes                                        | 0.80 (0.59, 1.09) | 0.55 (0.40, 0.81) |
| No                                         | Ref               | Ref               |
| <b>Stage</b>                               |                   |                   |
| Late                                       | 2.31 (1.63, 3.28) | 1.62 (1.07, 2.45) |
| Early                                      | Ref               | Ref               |
| <b>Treatment type</b>                      |                   |                   |
| Radiation and/or chemotherapy              | 1.13 (0.75, 1.69) | 0.91 (0.52, 1.60) |
| Surgery with Radiation and/or chemotherapy | 1.18 (0.78, 1.79) |                   |

|                                                                                              |                   |                          |
|----------------------------------------------------------------------------------------------|-------------------|--------------------------|
| Surgery only                                                                                 | Ref               | 0.90 (0.55, 1.46)<br>Ref |
| <b>Anatomical site</b>                                                                       |                   |                          |
| Other/unknown                                                                                | 2.32 (1.51, 3.56) | 3.35 (1.93, 5.80)        |
| Oral Cavity                                                                                  | 1.13 (0.80, 1.60) | 1.81 (1.12, 2.92)        |
| Laryngeal                                                                                    | Ref               | Ref                      |
| <i>Note: cHR = Crude hazard ratio; aHR = Adjusted hazard ratio; CI = confidence interval</i> |                   |                          |

**eFigure.** Kaplan-Meier survival curve showing the unadjusted association between smoking status at diagnosis and mortality, excluding patients with oropharyngeal cancer, n=294. Log-rank test shows that after excluding oropharyngeal, the association between smoking status at diagnosis and survival of head and neck cancer remained statistically significant,  $p=0.0131$

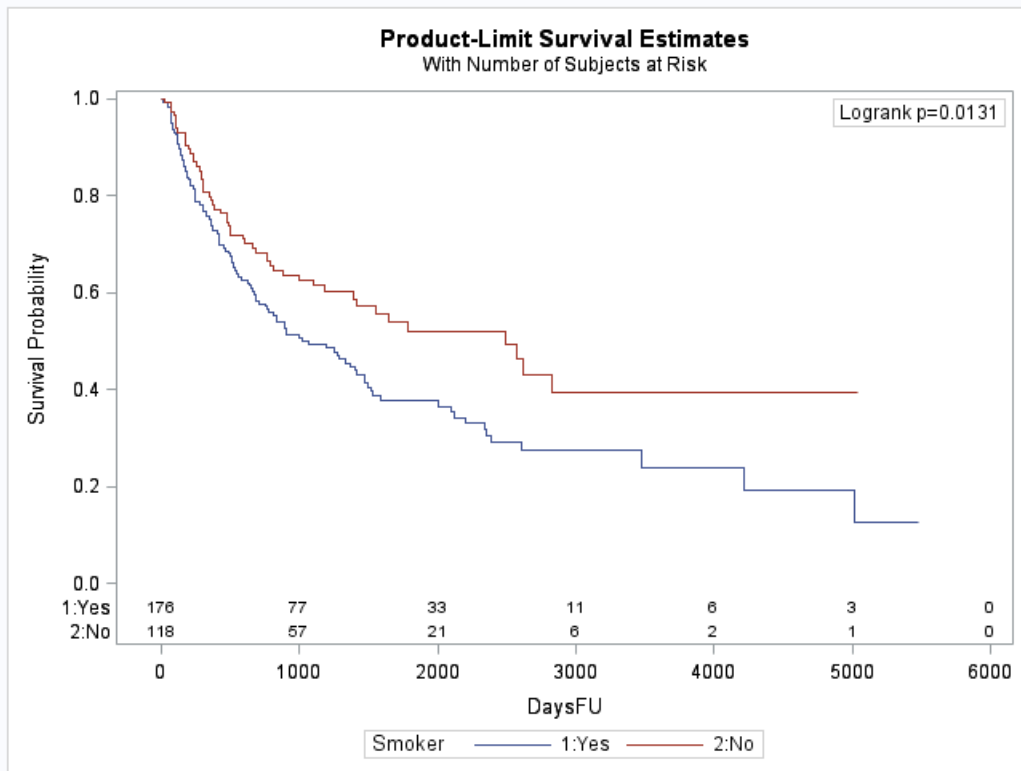

Supplement: jamaotolaryngolheadnecksurg-144-43-s001.pdf [file jamaotolaryngolheadnecksurg-144-43-s001.pdf]
